# Supplementary material for: Multimodal Haptic Device Enabling Naturalistic Surface Rendering During Active Touch
Source: Research Square preprint supplement (doi:10.21203/rs.3.rs-7428140/v1), 2025-08-25
Supplement: Supplementary file 1 [file 854f0dcf281924f827f24ec1.pdf]

# Supplementary Materials for “Multimodal Haptic Device Enabling Naturalistic Surface Rendering During Active Touch”

Haewon Jeong,<sup>1</sup> Khoa Anh,<sup>1</sup> Yasemin Vardar<sup>1\*</sup>

<sup>1</sup>Department of Cognitive Robotics, Delft University of Technology  
Mekelweg 5, 2628 CD Delft, Netherlands

Haewon Jeong and Khoa Anh contributed equally.

\*Corresponding author: Yasemin Vardar; E-mail: y.vardar@tudelft.nl.

October 2024

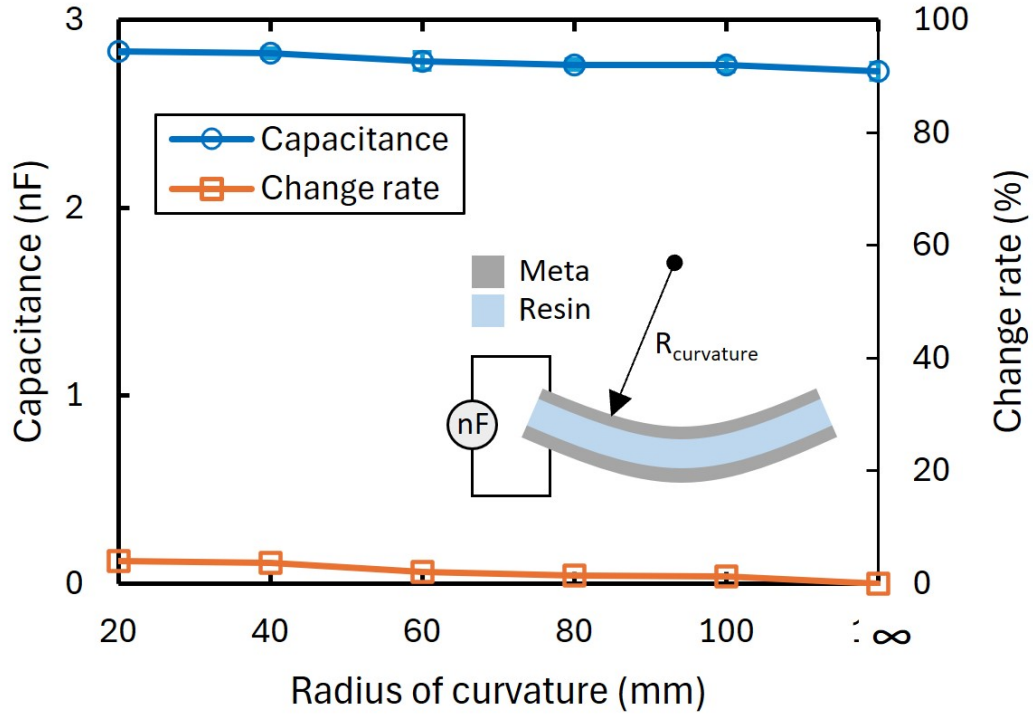

Figure S 1: Measured capacitance values of the flexible electrovibration layer under the varying radii of curvature.
